# Supplementary material for: Deciphering the formation mechanism of a protective corrosion product layer from electrochemical and natural corrosion behaviors of a nanocrystalline zinc coating
Source: Royal Society of Chemistry journal article supplement (doi:10.1039/c5ra02777b), 2015-01-01
Supplement: c5ra02777b1.pdf [file c5ra02777b1.pdf]

## Supporting Information

*for RSC Advances*

### Deciphering the formation mechanism of protective corrosion product layer from electrochemical and natural corrosion behaviors of nanocrystalline zinc coating

Qingyang Li,<sup>a</sup> Zhongbao Feng,<sup>a</sup> Lihua Liu,<sup>b</sup> Hong Xu,<sup>b</sup> Wang Ge,<sup>a</sup> Fenghuan Li<sup>a</sup> and Maozhong An<sup>a,\*</sup>

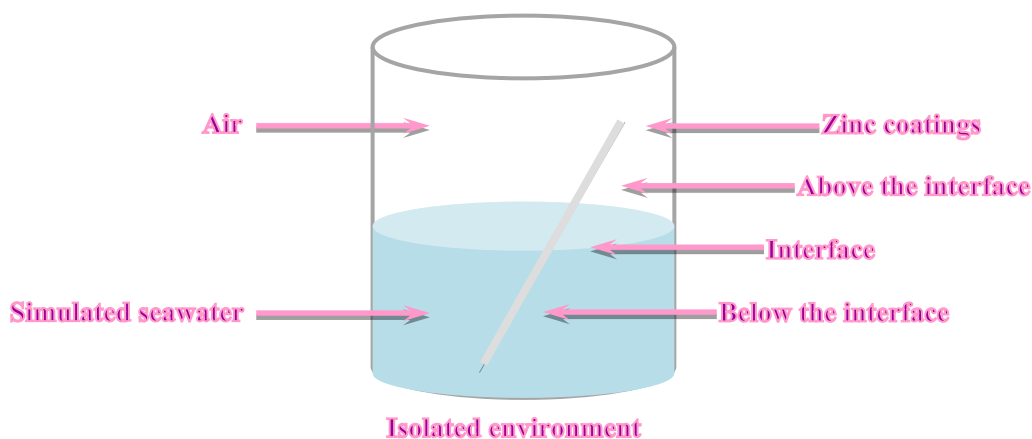

**Fig. S1** Schematic diagram for natural corrosion behaviors of coarse-grained and nanocrystalline zinc coatings.

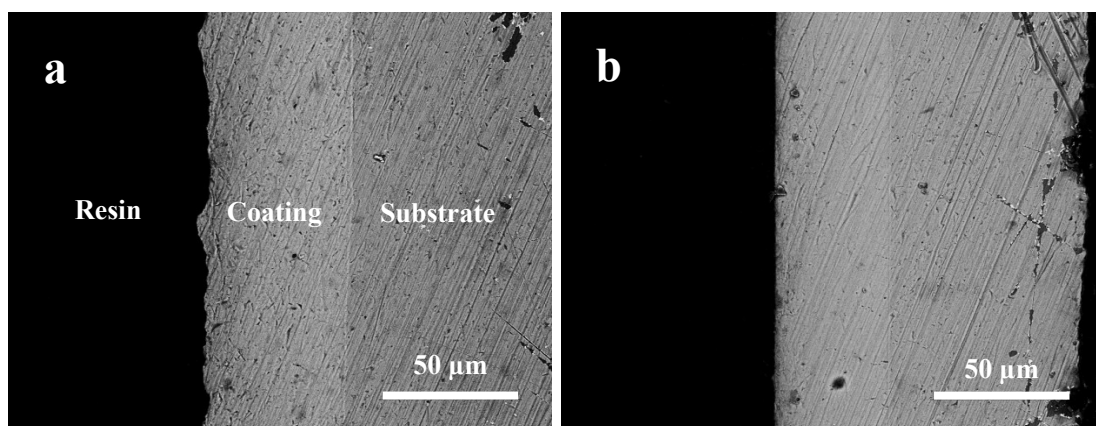

**Fig. S2** Cross-sectional morphologies of the coarse-grained (a) and nanocrystalline (b) zinc coatings.

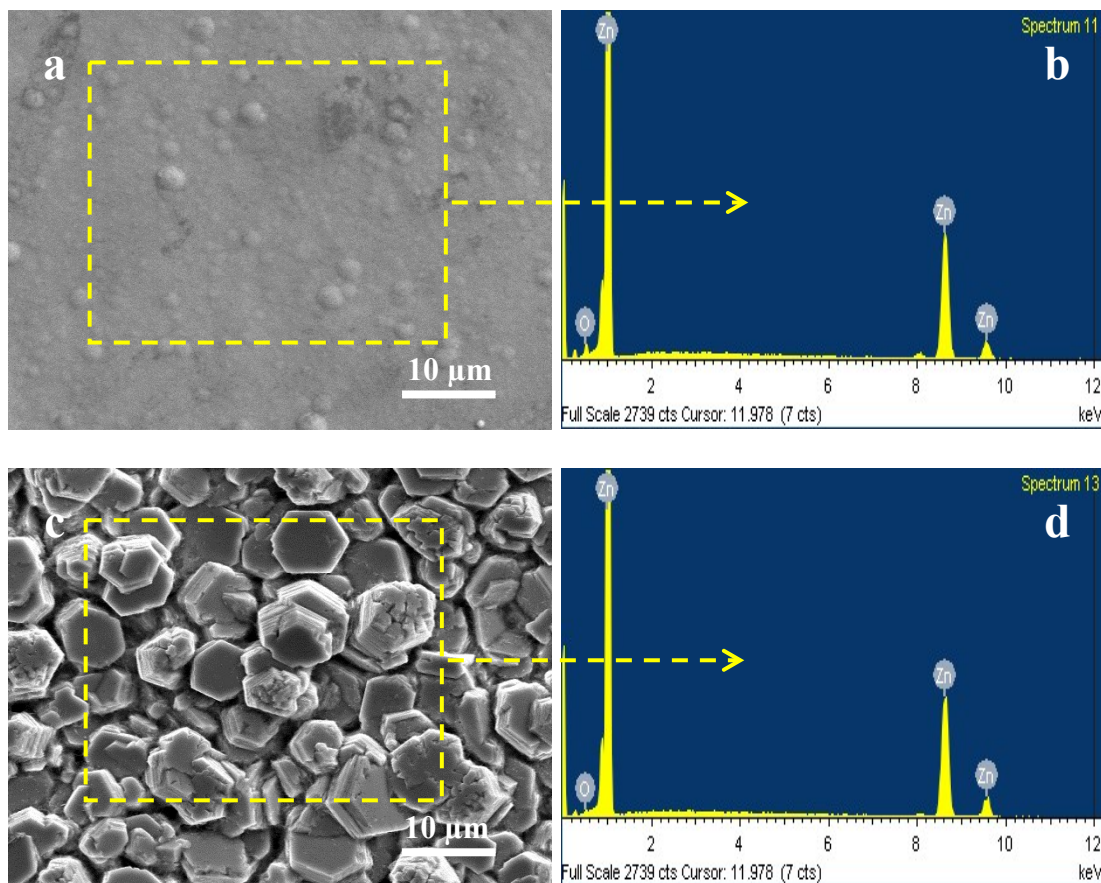

**Fig. S3** FESEM images and corresponding EDS patterns for the coarse-grained (a, b) and nanocrystalline (c, d) zinc coatings after 100 h of placement in an isolate environment without any corrosive medium as similar to Fig. S1.

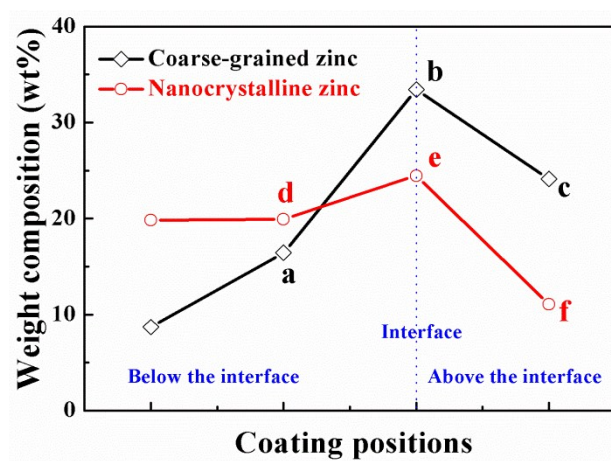

**Fig. S4** Atomic oxygen contents of the corroded surfaces of coarse-grained and nanocrystalline zinc coatings in simulated seawater after 100 h of immersion. (Points a-f corresponding to the O contents of EDS spectrums in Fig. 10, respectively.)

**Table S1** Fitting results for the EIS data acquired from coarse-grained (CG) and nanocrystalline (NC) zinc coatings in simulated seawater.

| Sample  | $R_s$<br>$\Omega \text{ cm}^2$ | $Q_l$<br>$F \text{ cm}^{-2}$ | $n$<br>$0 < n < 1$ | $R_l$<br>$\Omega \text{ cm}^2$ | $Q_{dl}$<br>$F \text{ cm}^{-2}$ | $n$<br>$0 < n < 1$ | $R_{ct}$<br>$\Omega \text{ cm}^2$ | $Z_w$<br>$\Omega \text{ cm}^2 \text{ sec}^{-0.5}$ | Chi<br>squared         |
|---------|--------------------------------|------------------------------|--------------------|--------------------------------|---------------------------------|--------------------|-----------------------------------|---------------------------------------------------|------------------------|
| CG      | 19.65                          | $1.515 \times 10^{-4}$       | 0.8159             | 132.2                          | $8.215 \times 10^{-3}$          | 0.6486             | 121.9                             | 0.1082                                            | $3.374 \times 10^{-4}$ |
| Error % | 0.5233                         | 4.216                        | 0.7789             | 2.107                          | 4.943                           | 5.468              | 6.312                             | 10                                                |                        |
| NC      | 11.22                          | $1.323 \times 10^{-4}$       | 0.5103             | 6.162                          | $8.67 \times 10^{-6}$           | 0.9514             | 360.2                             | 0.04448                                           | $1.607 \times 10^{-4}$ |
| Error % | 1.831                          | 4.389                        | 1.51               | 4.746                          | 10                              | 0.1325             | 0.5268                            | 3.781                                             |                        |

**Table S2** Fitting results for the EIS data acquired from the corrosion product layer of coarse-grained (CG-P) zinc coating in simulated seawater.

| Sample  | $R_s$<br>$\Omega \text{ cm}^2$ | $C_{l1}$<br>$F \text{ cm}^{-2}$ | $R_{l1}$<br>$\Omega \text{ cm}^2$ | $C_{l2}$<br>$F \text{ cm}^{-2}$ | $R_{l2}$<br>$\Omega \text{ cm}^2$ | $C_{dl}$<br>$F \text{ cm}^{-2}$ | $R_{ct}$<br>$\Omega \text{ cm}^2$ | Chi squared           |
|---------|--------------------------------|---------------------------------|-----------------------------------|---------------------------------|-----------------------------------|---------------------------------|-----------------------------------|-----------------------|
| CG-P    | 16.73                          | $2.818 \times 10^{-5}$          | 18.59                             | $9.481 \times 10^{-5}$          | 31.64                             | $5.313 \times 10^{-3}$          | 47.14                             | $1.28 \times 10^{-3}$ |
| Error % | 0.9606                         | 4.709                           | 5.762                             | 7.573                           | 3.634                             | 5.102                           | 2.786                             |                       |

**Table S3** Fitting results for the EIS data acquired from the corrosion product layer of nanocrystalline (NC-P) zinc coating in simulated seawater.

| Sample  | $R_s$<br>$\Omega \text{ cm}^2$ | $C_l$<br>$F \text{ cm}^{-2}$ | $R_l$<br>$\Omega \text{ cm}^2$ | $C_{dl}$<br>$F \text{ cm}^{-2}$ | $R_{ct}$<br>$\Omega \text{ cm}^2$ | $Z_w$<br>$\Omega \text{ cm}^2 \text{ sec}^{-0.5}$ | Chi squared            |
|---------|--------------------------------|------------------------------|--------------------------------|---------------------------------|-----------------------------------|---------------------------------------------------|------------------------|
| NC-P    | 17.86                          | $1.727 \times 10^{-5}$       | 52.18                          | $2.202 \times 10^{-5}$          | 86.89                             | 0.0441                                            | $5.470 \times 10^{-4}$ |
| Error % | 0.6351                         | 2.042                        | 6.131                          | 6.296                           | 3.714                             | 6.976                                             |                        |
